# Supplementary material for: Hydrate formation in water-laden microcapsules for temperature-sensitive release of encapsulants
Source: Royal Society of Chemistry journal article supplement (doi:10.1039/c6ra19786h), 2016-01-01
Supplement: c6ra19786h1.pdf [file c6ra19786h1.pdf]

## Supporting Information

# Hydrate Formation in Water-Laden Microcapsules for Temperature-Sensitive Release of Encapsulants

*Juwoon Park,<sup>‡,a</sup> Sang Seok Lee,<sup>‡,b</sup> Young hoon Sohn,<sup>a</sup> Shin-Hyun Kim,<sup>\*b</sup> and Yutaek Seo<sup>\*a</sup>*

<sup>a</sup>Department of Naval Architecture and Ocean Engineering, Collage of Engineering, Seoul  
National University, 1, Gwanak-ro, Gwanak-gu, Seoul, 151 - 744, Korea

<sup>b</sup>Department of Chemical and Biomolecular Engineering (BK21+ program), Korea Advanced  
Institute of Science and Technology (KAIST), 291 Daehak-ro, Yuseong-gu, Daejeon 305-701,  
Republic of Korea

CORRESPONDING AUTHORS: Yutaek Seo and Shin-Hyun Kim

AUTHOR EMAIL ADDRESSES: [Yutaek.seo@snu.ac.kr](mailto:Yutaek.seo@snu.ac.kr) and [kim.sh@kaist.ac.kr](mailto:kim.sh@kaist.ac.kr)

## Table of Contents

**Fig. S1** SEM images of microcapsules taken in 1 day (a) and 2 weeks (b) during hydrate formation.

**Fig. S2** Optical microscope images of microcapsules taken after dissociation, where two different rates of heating are used: (a)  $\Delta 19^{\circ}\text{C}/1\text{h}$  and (b)  $\Delta 19^{\circ}\text{C}/5\text{days}$ . (c) Fraction of broken microcapsules in (a, b).

**Movie S1** show generation of W/O/W double-emulsion drops by inner drop-triggered breakup in a glass capillary microfluidic device. This movie is taken by high speed camera (Motionscope, M3, Redlake) and played 4 times slower than real time.

### S1. Fracturing of microcapsules during hydrate formation

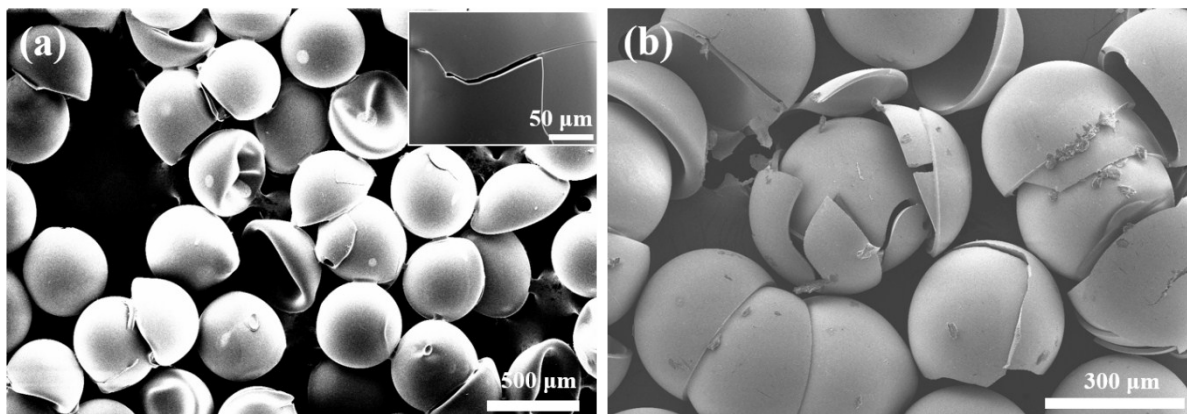

**Fig. S1** SEM images of microcapsules taken in 1 day (a) and 2 weeks (b) during hydrate formation.

### S2. Influence of dissociation rate

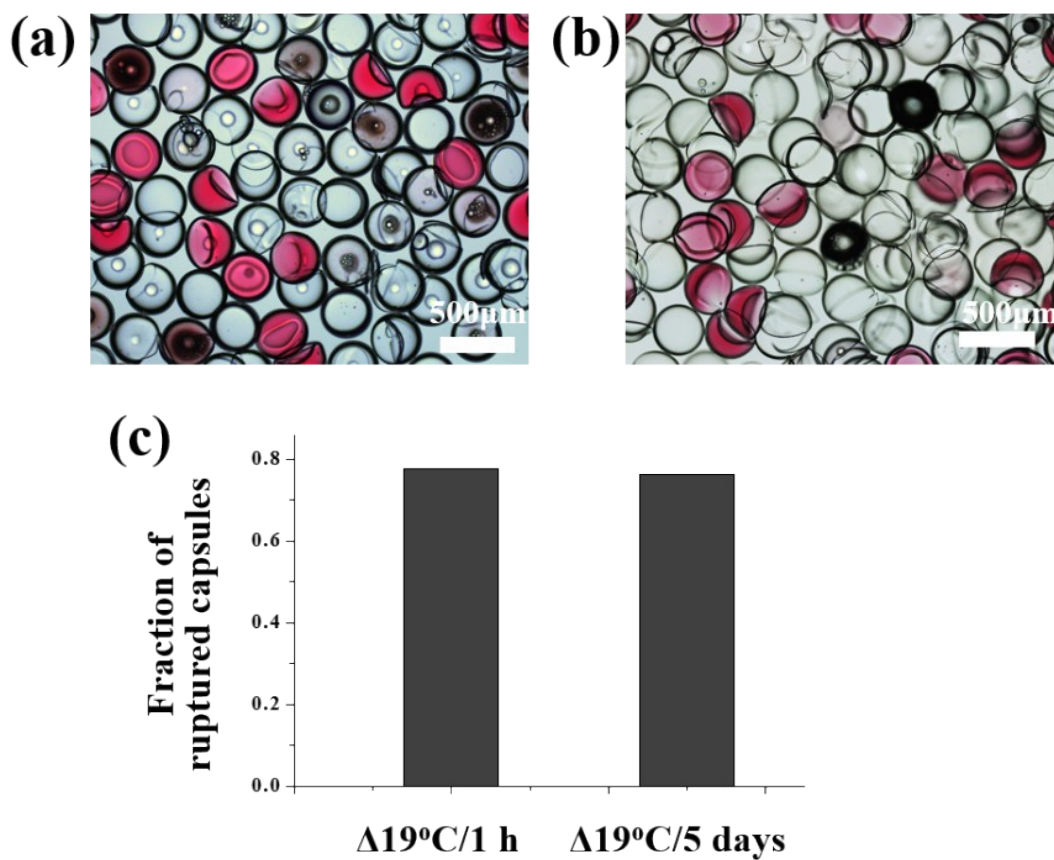

**Fig. S2** Optical microscope images of microcapsules taken after dissociation, where two different rates of heating are used: (a)  $\Delta 19^\circ\text{C}/1\text{h}$  and (b)  $\Delta 19^\circ\text{C}/5\text{days}$ . (c) Fraction of broken microcapsules in (a, b).

### **S3. Description of supporting movie**

**Movie S1** show generation of W/O/W double-emulsion drops by inner drop-triggered breakup in a glass capillary microfluidic device. This movie is taken by high speed camera (Motionscope, M3, Redlake) and played 4 times slower than real time.
